# Supplementary material
Source: Springer Nature journal article supplement (https://www.springermedizin.de/resource/supplementary/10194_2012_264_MOESM1_ESM.pdf/9422564)

# Spontaneous pain

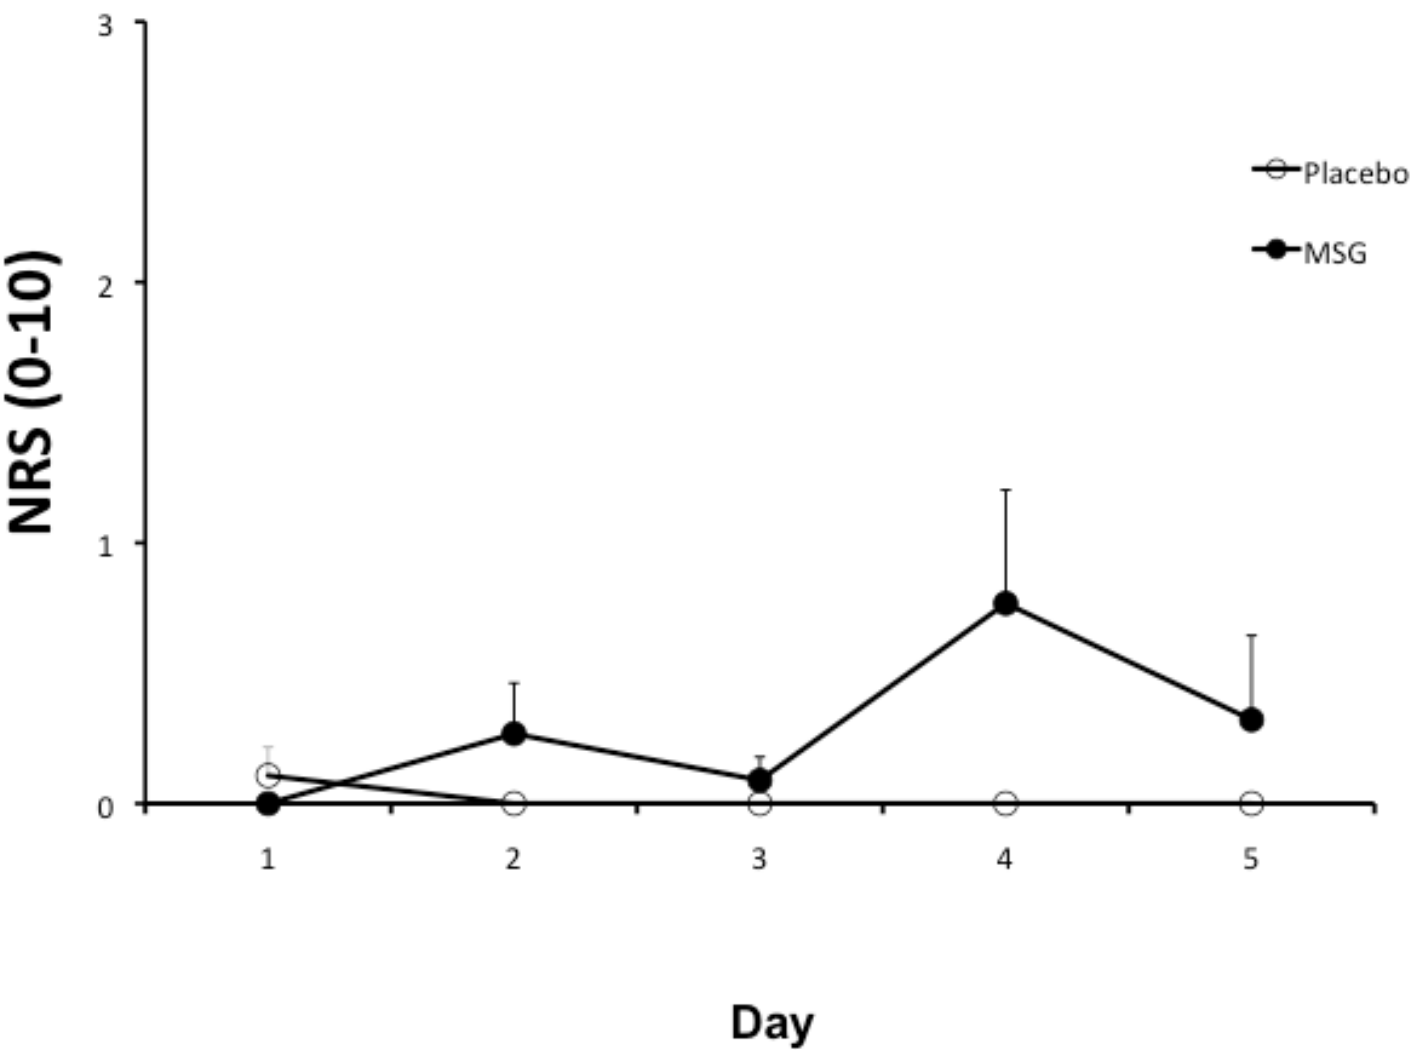

Supplement: MOESM1 [file 9422564]
